# Supplementary material for: Ankylosing Spondylitis and the Risk of Lung Cancer: A Meta-Analysis and Mendelian Randomization
Source: Front Genet. 2022 Jul 15;13:861984. doi: 10.3389/fgene.2022.861984 (PMC9337881; doi:10.3389/fgene.2022.861984)
Supplement: Supplementary file 2 [file DataSheet2.xlsx]

## Sheet: Supplementary Table 1
Supplementary Table 1. Search strings for literatures applied in our meta-analysis.
Database	Search string	Results
PubMed	("spondylitis, ankylosing"[MeSH Terms] OR "ankylopoietic spondylarthritis"[Text Word] OR "ankylopoietic spondylitis"[Text Word] OR "ankylosing spine"[Text Word] OR "Ankylosing Spondylitis"[Text Word] OR "ankylosing spondylarthritis"[Text Word] OR "ankylosis spondylitis"[Text Word] OR "Bechterew disease"[Text Word] OR "morbus bechterew"[Text Word] OR "spinal ankylosis"[Text Word] OR "spine ankylos…	37
Cochrane Library	ankylopoietic spondylarthritis' OR 'ankylopoietic spondylitis' OR 'ankylosing spine' OR 'ankylosing spondilitis' OR 'ankylosing spondylarthritis' OR 'ankylosing spondylarthrosis' OR 'ankylosis spondylitis' OR 'Ankylosing Spondylarthritides' OR 'Spondylarthritides, Ankylosing' OR 'Spondylarthritis, Ankylosing' OR 'Ankylosing Spondylitis' OR 'Bechterew's Disease' OR 'Marie Struempell Disease' OR 'R…	24
Web of Science	TS=('ankylopoietic spondylarthritis' OR 'ankylopoietic spondylitis' OR 'ankylosing spine' OR 'ankylosing spondilitis' OR 'ankylosing spondylarthritis' OR 'ankylosing spondylarthrosis' OR 'ankylosis spondylitis' OR 'bekhterev disease' OR 'spinal ankylosis' OR 'spine ankylosis' OR 'spondylarthritis ankylopoietica' OR 'spondylarthritis ankylosans' OR 'spondylitis ankylopoetica' OR 'spondylitis ankyl…	199
Embase	(ankylating AND spondylitis OR (ankylopoietic AND spondylarthritis) OR (ankylopoietic AND spondylitis) OR (ankylosing AND spine) OR (ankylosing AND spondilitis) OR (ankylosing AND spondylarthritis) OR (ankylosing AND spondylarthrosis) OR (ankylosis AND spondylitis) OR (ankylotic AND spondylitis) OR (bechterew AND disease) OR (bekhterev AND disease) OR (morbus AND bechterew) OR (spinal AND ankylos…	439

## Sheet: Supplementary Table 2
Supplementary Table 2. List of details for each selected SNPs of AS (DOI:10.1038/ng.2667.)
SNP	Beta	Standard Error	Chromosome	Effect Allele	Other Allele	P-value	Exclusion
rs11209026	-0.103584	0.00954481	1	A	G	1.94178e-27	FALSE
rs41299637	-0.0390527	0.00491011	1	G	T	1.81259e-15	FALSE
rs4129267	-0.0307685	0.00422605	1	T	C	3.32124e-13	FALSE
rs1801274	0.0253178	0.00417687	1	G	A	1.34921e-09	FALSE
rs6600247	0.0328332	0.00415088	1	C	T	2.57573e-15	FALSE
rs4672505	-0.0597772	0.00415105	2	G	A	5.13807e-47	FALSE
rs4676410	0.0281014	0.00490215	2	A	G	9.8976e-09	FALSE
rs12615545	0.0254728	0.00417273	2	C	T	1.03065e-09	FALSE
rs27529	-0.0620354	0.00429859	5	G	A	3.27642e-47	FALSE
rs6556416	0.0252152	0.0046002	5	C	A	4.22124e-08	FALSE
rs1041926	-0.0748291	0.0116918	6	A	G	1.55214e-10	FALSE
rs2596501	-0.152336	0.00419401	6	T	C	1e-200	FALSE
rs130075	0.335829	NA	6	T	C	1e-200	TRUE
rs2517655	0.0882856	0.00465575	6	T	C	3.46897e-80	FALSE
rs1128905	-0.0237165	0.00409459	9	C	T	6.94848e-09	FALSE
rs11190133	-0.0338671	0.00449401	10	T	C	4.84395e-14	FALSE
rs1250550	-0.026036	0.00430465	10	A	C	1.46339e-09	FALSE
rs11065898	0.0262524	0.00480641	12	T	C	4.70923e-08	FALSE
rs1860545	-0.027474	0.00435378	12	A	G	2.78362e-10	FALSE
rs11624293	0.0428679	0.00669161	14	C	T	1.49176e-10	FALSE
rs7191548	0.0249853	0.00428493	16	C	T	5.51087e-09	FALSE
rs9901869	0.0319036	0.00408853	17	A	G	6.03671e-15	FALSE
rs2531875	-0.0273233	0.00424463	17	T	G	1.21745e-10	FALSE
rs35164067	-0.031078	0.00495021	19	A	G	3.42713e-10	FALSE
rs2836883	-0.0396768	0.00474798	21	A	G	6.45654e-17	FALSE
rs743479	-0.0234235	0.00417581	21	T	C	2.03105e-08	FALSE

## Sheet: Supplementary Table 3
Supplementary Table 3. Details of studies included in Mendelian randomization analyses
Trait	First author	Consortium	Number of cases	Number of controls	Sample size	Year	DOI	Population
Lung cancer	Wang Y	ILCCO	11348	15861	27209	2014	10.1038/ng.3002.	European
Squamous cell lung cancer	Wang Y	ILCCO	3275	15038	18313	2014	10.1038/ng.3002.	European
Lung adenocarcinoma	Wang Y	ILCCO	3422	14894	18336	2014	10.1038/ng.3002.	European
Lung cancer	Burrows	UK Biobank	2671	372016	374687	2021	NA	European
Cancer code self-reported: lung cancer	Neale	Neale Lab	190	336969	337159	2017	NA	European
ILCCO: International Lung and Cancer Consortium

## Sheet: Supplementary Table 4
	Supplementary Table 4. Details of studies of the potential confounder and the mediators included in Mendelian randomization analyses
ID	Trait	First author	Consortium	Study participants	Cases, n	Controls, n	Year	Website
ukb-b-12276	Meat consumers	Ben Elsworth	MRC-IEU	64949	44775	20174	2018	https://gwas.mrcieu.ac.uk/
ukb-b-6324	Processed meat intake	Ben Elsworth	MRC-IEU	461981	NA	NA	2018	https://gwas.mrcieu.ac.uk/
ukb-b-20261	Ever smoked	Ben Elsworth	MRC-IEU	461066	280508	180558	2018	https://gwas.mrcieu.ac.uk/
ukb-b-223	Current tobacco smoking	Ben Elsworth	MRC-IEU	462434	NA	NA	2018	https://gwas.mrcieu.ac.uk/
ukb-a-67	COPD	Neale	Neale Lab	337159	1179	335980	2017	https://gwas.mrcieu.ac.uk/
ieu-a-1283	Alcohol consumption	Clarke	UK Biobank	112117	NA	NA	2017	https://gwas.mrcieu.ac.uk/
	NA:not accessible; COPD:chronic obstructive pulmonary disease

## Sheet: Supplementary Table 5
Supplementary Table 5. Quality assessment of the included studies in the meta-analysis.
Study	Reliable representativeness of the exposed cohort	Adequate source of the non-exposed cohort	Reliable ascertainment of exposure	Outcome of interest was not present at start of study	Comparability	Reliable assessment of outcome	Long follow up period	Adequacy of follow up of cohorts	NOS score (0-9)
Carmona et al10	Yes	Yes	Yes	Yes	Yes	Yes	Yes	No	7
Chang et al13	Yes	Yes	Yes	Yes	Yes	Yes	Yes	No	7
Feltelius et al11	Yes	Yes	Yes	Yes	Yes	Yes	Yes	No	7
Hellgren et al14	Yes	Yes	Yes	Yes	Yes	Yes	Yes	No	7
Kelty et al12	Yes	No	Yes	No	Yes	Yes	Yes	No	5
Sun et al9	Yes	Yes	Yes	Yes	Yes	Yes	Yes	No	7
Ward et al15	Yes	Yes	Yes	Yes	Yes	Yes	Yes	No	7
NOS: Newcastle-Ottawa Scale

## Sheet: Supplementary Table 6
Supplementary Table 6. Estimation of Wald ratio between each SNP related to AS and risk of Lung Cancer and its subtypes.
Exposure	Outcome	SNP	Beta	Standard Error	p-value
Ankylosing spondylitis || id:ebi-a-GCST005529	Lung adenocarcinoma || id:ieu-a-965	rs1041926	-1.50408	1.14898	0.190514
Ankylosing spondylitis || id:ebi-a-GCST005529	Lung adenocarcinoma || id:ieu-a-965	rs11065898	1.66717	1.35298	0.217868
Ankylosing spondylitis || id:ebi-a-GCST005529	Lung adenocarcinoma || id:ieu-a-965	rs11190133	-0.233256	0.885993	0.792342
Ankylosing spondylitis || id:ebi-a-GCST005529	Lung adenocarcinoma || id:ieu-a-965	rs11209026	0.0982256	0.510726	0.847487
Ankylosing spondylitis || id:ebi-a-GCST005529	Lung adenocarcinoma || id:ieu-a-965	rs1128905	-1.7009	1.20355	0.157587
Ankylosing spondylitis || id:ebi-a-GCST005529	Lung adenocarcinoma || id:ieu-a-965	rs11624293	0.0412066	1.1008	0.97014
Ankylosing spondylitis || id:ebi-a-GCST005529	Lung adenocarcinoma || id:ieu-a-965	rs1250550	1.84698	1.06591	0.0831361
Ankylosing spondylitis || id:ebi-a-GCST005529	Lung adenocarcinoma || id:ieu-a-965	rs12615545	-1.47014	1.03899	0.157078
Ankylosing spondylitis || id:ebi-a-GCST005529	Lung adenocarcinoma || id:ieu-a-965	rs1801274	1.20674	1.04926	0.250109
Ankylosing spondylitis || id:ebi-a-GCST005529	Lung adenocarcinoma || id:ieu-a-965	rs1860545	0.566332	0.993012	0.568462
Ankylosing spondylitis || id:ebi-a-GCST005529	Lung adenocarcinoma || id:ieu-a-965	rs2531875	-1.52432	0.979311	0.119584
Ankylosing spondylitis || id:ebi-a-GCST005529	Lung adenocarcinoma || id:ieu-a-965	rs2596501	0.219182	0.175631	0.212044
Ankylosing spondylitis || id:ebi-a-GCST005529	Lung adenocarcinoma || id:ieu-a-965	rs27529	0.443945	0.470409	0.345301
Ankylosing spondylitis || id:ebi-a-GCST005529	Lung adenocarcinoma || id:ieu-a-965	rs2836883	-1.08893	0.807172	0.177317
Ankylosing spondylitis || id:ebi-a-GCST005529	Lung adenocarcinoma || id:ieu-a-965	rs35164067	-1.42825	1.13621	0.208741
Ankylosing spondylitis || id:ebi-a-GCST005529	Lung adenocarcinoma || id:ieu-a-965	rs4129267	-0.473195	0.917822	0.60616
Ankylosing spondylitis || id:ebi-a-GCST005529	Lung adenocarcinoma || id:ieu-a-965	rs41299637	0.573768	0.792929	0.469307
Ankylosing spondylitis || id:ebi-a-GCST005529	Lung adenocarcinoma || id:ieu-a-965	rs4672505	0.979281	0.501529	0.050868
Ankylosing spondylitis || id:ebi-a-GCST005529	Lung adenocarcinoma || id:ieu-a-965	rs4676410	-0.420677	1.25855	0.738187
Ankylosing spondylitis || id:ebi-a-GCST005529	Lung adenocarcinoma || id:ieu-a-965	rs6556416	0.846279	1.1403	0.457995
Ankylosing spondylitis || id:ebi-a-GCST005529	Lung adenocarcinoma || id:ieu-a-965	rs6600247	0.69999	0.855019	0.412967
Ankylosing spondylitis || id:ebi-a-GCST005529	Lung adenocarcinoma || id:ieu-a-965	rs743479	0.769048	1.21946	0.528271
Ankylosing spondylitis || id:ebi-a-GCST005529	Lung adenocarcinoma || id:ieu-a-965	rs9901869	-0.829888	0.982616	0.398351
Ankylosing spondylitis || id:ebi-a-GCST005529	Lung cancer || id:ieu-a-966	rs1041926	-0.535461	0.812732	0.509998
Ankylosing spondylitis || id:ebi-a-GCST005529	Lung cancer || id:ieu-a-966	rs11065898	1.53323	0.874777	0.0796517
Ankylosing spondylitis || id:ebi-a-GCST005529	Lung cancer || id:ieu-a-966	rs11190133	0.251577	0.565209	0.656244
Ankylosing spondylitis || id:ebi-a-GCST005529	Lung cancer || id:ieu-a-966	rs11209026	0.258796	0.338981	0.445194
Ankylosing spondylitis || id:ebi-a-GCST005529	Lung cancer || id:ieu-a-966	rs1128905	-0.844977	0.768705	0.271672
Ankylosing spondylitis || id:ebi-a-GCST005529	Lung cancer || id:ieu-a-966	rs11624293	1.12553	0.754481	0.135753
Ankylosing spondylitis || id:ebi-a-GCST005529	Lung cancer || id:ieu-a-966	rs1250550	0.00307279	0.722845	0.996608
Ankylosing spondylitis || id:ebi-a-GCST005529	Lung cancer || id:ieu-a-966	rs12615545	0.372431	0.711661	0.600747
Ankylosing spondylitis || id:ebi-a-GCST005529	Lung cancer || id:ieu-a-966	rs1801274	0.453543	0.69698	0.515224
Ankylosing spondylitis || id:ebi-a-GCST005529	Lung cancer || id:ieu-a-966	rs1860545	-0.619185	0.666921	0.353188
Ankylosing spondylitis || id:ebi-a-GCST005529	Lung cancer || id:ieu-a-966	rs2531875	-0.436657	0.661267	0.50904
Ankylosing spondylitis || id:ebi-a-GCST005529	Lung cancer || id:ieu-a-966	rs2596501	0.276451	0.113191	0.0145919
Ankylosing spondylitis || id:ebi-a-GCST005529	Lung cancer || id:ieu-a-966	rs27529	0.484399	0.30863	0.116528
Ankylosing spondylitis || id:ebi-a-GCST005529	Lung cancer || id:ieu-a-966	rs2836883	-0.459112	0.514205	0.371933
Ankylosing spondylitis || id:ebi-a-GCST005529	Lung cancer || id:ieu-a-966	rs35164067	-0.460902	0.721958	0.52321
Ankylosing spondylitis || id:ebi-a-GCST005529	Lung cancer || id:ieu-a-966	rs4129267	-0.671788	0.606237	0.267807
Ankylosing spondylitis || id:ebi-a-GCST005529	Lung cancer || id:ieu-a-966	rs41299637	0.271246	0.52255	0.603704
Ankylosing spondylitis || id:ebi-a-GCST005529	Lung cancer || id:ieu-a-966	rs4672505	0.402269	0.316743	0.204079
Ankylosing spondylitis || id:ebi-a-GCST005529	Lung cancer || id:ieu-a-966	rs4676410	-0.0916079	0.81544	0.910552
Ankylosing spondylitis || id:ebi-a-GCST005529	Lung cancer || id:ieu-a-966	rs6556416	0.905228	0.749032	0.226844
Ankylosing spondylitis || id:ebi-a-GCST005529	Lung cancer || id:ieu-a-966	rs6600247	0.136628	0.54786	0.803064
Ankylosing spondylitis || id:ebi-a-GCST005529	Lung cancer || id:ieu-a-966	rs743479	0.448507	0.790019	0.570227
Ankylosing spondylitis || id:ebi-a-GCST005529	Lung cancer || id:ieu-a-966	rs9901869	0.316889	0.615354	0.606574
Ankylosing spondylitis || id:ebi-a-GCST005529	Squamous cell lung cancer || id:ieu-a-967	rs1041926	1.82887	1.4514	0.207642
Ankylosing spondylitis || id:ebi-a-GCST005529	Squamous cell lung cancer || id:ieu-a-967	rs11065898	1.00226	1.32011	0.447716
Ankylosing spondylitis || id:ebi-a-GCST005529	Squamous cell lung cancer || id:ieu-a-967	rs11190133	1.3104	0.831692	0.115122
Ankylosing spondylitis || id:ebi-a-GCST005529	Squamous cell lung cancer || id:ieu-a-967	rs11209026	0.185899	0.522127	0.721809
Ankylosing spondylitis || id:ebi-a-GCST005529	Squamous cell lung cancer || id:ieu-a-967	rs1128905	-1.53973	1.19697	0.198319
Ankylosing spondylitis || id:ebi-a-GCST005529	Squamous cell lung cancer || id:ieu-a-967	rs11624293	1.72565	1.17799	0.142945
Ankylosing spondylitis || id:ebi-a-GCST005529	Squamous cell lung cancer || id:ieu-a-967	rs1250550	-0.136988	1.11457	0.902181
Ankylosing spondylitis || id:ebi-a-GCST005529	Squamous cell lung cancer || id:ieu-a-967	rs12615545	1.06325	1.10624	0.336483
Ankylosing spondylitis || id:ebi-a-GCST005529	Squamous cell lung cancer || id:ieu-a-967	rs1801274	0.853016	1.05771	0.419971
Ankylosing spondylitis || id:ebi-a-GCST005529	Squamous cell lung cancer || id:ieu-a-967	rs1860545	-2.66506	1.0792	0.0135313
Ankylosing spondylitis || id:ebi-a-GCST005529	Squamous cell lung cancer || id:ieu-a-967	rs2531875	-0.0533998	1.02378	0.958402
Ankylosing spondylitis || id:ebi-a-GCST005529	Squamous cell lung cancer || id:ieu-a-967	rs2596501	0.371248	0.17101	0.0299376
Ankylosing spondylitis || id:ebi-a-GCST005529	Squamous cell lung cancer || id:ieu-a-967	rs27529	0.124159	0.462849	0.788507
Ankylosing spondylitis || id:ebi-a-GCST005529	Squamous cell lung cancer || id:ieu-a-967	rs2836883	-1.08101	0.805962	0.179835
Ankylosing spondylitis || id:ebi-a-GCST005529	Squamous cell lung cancer || id:ieu-a-967	rs35164067	-0.53849	1.11043	0.627721
Ankylosing spondylitis || id:ebi-a-GCST005529	Squamous cell lung cancer || id:ieu-a-967	rs4129267	-0.349481	0.9278	0.706414
Ankylosing spondylitis || id:ebi-a-GCST005529	Squamous cell lung cancer || id:ieu-a-967	rs41299637	-0.267364	0.820507	0.744536
Ankylosing spondylitis || id:ebi-a-GCST005529	Squamous cell lung cancer || id:ieu-a-967	rs4672505	0.523286	0.490956	0.286491
Ankylosing spondylitis || id:ebi-a-GCST005529	Squamous cell lung cancer || id:ieu-a-967	rs4676410	-1.12645	1.21994	0.355817
Ankylosing spondylitis || id:ebi-a-GCST005529	Squamous cell lung cancer || id:ieu-a-967	rs6556416	2.39622	1.1062	0.0302979
Ankylosing spondylitis || id:ebi-a-GCST005529	Squamous cell lung cancer || id:ieu-a-967	rs6600247	0.928024	0.860836	0.281012
Ankylosing spondylitis || id:ebi-a-GCST005529	Squamous cell lung cancer || id:ieu-a-967	rs743479	1.05293	1.22087	0.388443
Ankylosing spondylitis || id:ebi-a-GCST005529	Squamous cell lung cancer || id:ieu-a-967	rs9901869	1.65703	0.910399	0.0687422
Ankylosing spondylitis || id:ebi-a-GCST005529	Lung cancer || id:ieu-b-4954	rs1041926	-0.0137384	0.00747215	0.0659724
Ankylosing spondylitis || id:ebi-a-GCST005529	Lung cancer || id:ieu-b-4954	rs11065898	0.0039097	0.00892589	0.661373
Ankylosing spondylitis || id:ebi-a-GCST005529	Lung cancer || id:ieu-b-4954	rs11190133	0.00422327	0.00636148	0.506766
Ankylosing spondylitis || id:ebi-a-GCST005529	Lung cancer || id:ieu-b-4954	rs11209026	0.00215522	0.00375669	0.56617
Ankylosing spondylitis || id:ebi-a-GCST005529	Lung cancer || id:ieu-b-4954	rs1128905	0.00797276	0.00820572	0.331245
Ankylosing spondylitis || id:ebi-a-GCST005529	Lung cancer || id:ieu-b-4954	rs11624293	0.000929213	0.00787477	0.906069
Ankylosing spondylitis || id:ebi-a-GCST005529	Lung cancer || id:ieu-b-4954	rs1250550	0.00436945	0.00780527	0.575611
Ankylosing spondylitis || id:ebi-a-GCST005529	Lung cancer || id:ieu-b-4954	rs12615545	0.00922592	0.00774037	0.233292
Ankylosing spondylitis || id:ebi-a-GCST005529	Lung cancer || id:ieu-b-4954	rs1801274	0.00287832	0.00769668	0.708427
Ankylosing spondylitis || id:ebi-a-GCST005529	Lung cancer || id:ieu-b-4954	rs1860545	-0.0027964	0.00723164	0.698986
Ankylosing spondylitis || id:ebi-a-GCST005529	Lung cancer || id:ieu-b-4954	rs2517655	-0.00876245	0.0026044	0.000766883
Ankylosing spondylitis || id:ebi-a-GCST005529	Lung cancer || id:ieu-b-4954	rs2531875	-0.00230101	0.00739804	0.755778
Ankylosing spondylitis || id:ebi-a-GCST005529	Lung cancer || id:ieu-b-4954	rs2596501	0.00113063	0.00127359	0.374675
Ankylosing spondylitis || id:ebi-a-GCST005529	Lung cancer || id:ieu-b-4954	rs27529	0.00839166	0.00330847	0.0111992
Ankylosing spondylitis || id:ebi-a-GCST005529	Lung cancer || id:ieu-b-4954	rs2836883	0.00424752	0.00555067	0.444137
Ankylosing spondylitis || id:ebi-a-GCST005529	Lung cancer || id:ieu-b-4954	rs35164067	-0.0135069	0.00778287	0.082658
Ankylosing spondylitis || id:ebi-a-GCST005529	Lung cancer || id:ieu-b-4954	rs4129267	0.00817076	0.00641588	0.202833
Ankylosing spondylitis || id:ebi-a-GCST005529	Lung cancer || id:ieu-b-4954	rs41299637	0.0060806	0.00546935	0.266242
Ankylosing spondylitis || id:ebi-a-GCST005529	Lung cancer || id:ieu-b-4954	rs4672505	0.00387322	0.00338029	0.251868
Ankylosing spondylitis || id:ebi-a-GCST005529	Lung cancer || id:ieu-b-4954	rs4676410	-0.00294888	0.00857893	0.731046
Ankylosing spondylitis || id:ebi-a-GCST005529	Lung cancer || id:ieu-b-4954	rs6556416	-0.0204205	0.00824463	0.0132555
Ankylosing spondylitis || id:ebi-a-GCST005529	Lung cancer || id:ieu-b-4954	rs6600247	0.00378538	0.00594645	0.5244
Ankylosing spondylitis || id:ebi-a-GCST005529	Lung cancer || id:ieu-b-4954	rs7191548	0.0131128	0.00811945	0.106313
Ankylosing spondylitis || id:ebi-a-GCST005529	Lung cancer || id:ieu-b-4954	rs743479	0.00762538	0.00851346	0.370421
Ankylosing spondylitis || id:ebi-a-GCST005529	Lung cancer || id:ieu-b-4954	rs9901869	-0.00171744	0.00610298	0.778396
Ankylosing spondylitis || id:ebi-a-GCST005529	Cancer code self-reported: lung cancer || id:ukb-a-54	rs1041926	-0.00129553	0.00219304	0.55469
Ankylosing spondylitis || id:ebi-a-GCST005529	Cancer code self-reported: lung cancer || id:ukb-a-54	rs11065898	0.000830088	0.00265544	0.754585
Ankylosing spondylitis || id:ebi-a-GCST005529	Cancer code self-reported: lung cancer || id:ukb-a-54	rs11190133	-0.00352138	0.00189311	0.0628714
Ankylosing spondylitis || id:ebi-a-GCST005529	Cancer code self-reported: lung cancer || id:ukb-a-54	rs11209026	0.00259694	0.00111629	0.0199975
Ankylosing spondylitis || id:ebi-a-GCST005529	Cancer code self-reported: lung cancer || id:ukb-a-54	rs1128905	-0.00431438	0.0024397	0.0769928
Ankylosing spondylitis || id:ebi-a-GCST005529	Cancer code self-reported: lung cancer || id:ukb-a-54	rs11624293	6.80761e-05	0.00234033	0.976794
Ankylosing spondylitis || id:ebi-a-GCST005529	Cancer code self-reported: lung cancer || id:ukb-a-54	rs1250550	-0.00196152	0.00231949	0.397737
Ankylosing spondylitis || id:ebi-a-GCST005529	Cancer code self-reported: lung cancer || id:ukb-a-54	rs12615545	0.00357745	0.00230459	0.120586
Ankylosing spondylitis || id:ebi-a-GCST005529	Cancer code self-reported: lung cancer || id:ukb-a-54	rs1801274	-0.00166427	0.0022956	0.468464
Ankylosing spondylitis || id:ebi-a-GCST005529	Cancer code self-reported: lung cancer || id:ukb-a-54	rs1860545	-0.00167937	0.00215083	0.43492
Ankylosing spondylitis || id:ebi-a-GCST005529	Cancer code self-reported: lung cancer || id:ukb-a-54	rs2517655	-0.000303959	0.000770631	0.693264
Ankylosing spondylitis || id:ebi-a-GCST005529	Cancer code self-reported: lung cancer || id:ukb-a-54	rs2531875	-0.000693448	0.00220589	0.753246
Ankylosing spondylitis || id:ebi-a-GCST005529	Cancer code self-reported: lung cancer || id:ukb-a-54	rs2596501	0.000225349	0.000380678	0.553873
Ankylosing spondylitis || id:ebi-a-GCST005529	Cancer code self-reported: lung cancer || id:ukb-a-54	rs27529	-0.000664782	0.0009863	0.500301
Ankylosing spondylitis || id:ebi-a-GCST005529	Cancer code self-reported: lung cancer || id:ukb-a-54	rs2836883	0.000305607	0.00164957	0.853022
Ankylosing spondylitis || id:ebi-a-GCST005529	Cancer code self-reported: lung cancer || id:ukb-a-54	rs35164067	-0.00246647	0.00231507	0.286697
Ankylosing spondylitis || id:ebi-a-GCST005529	Cancer code self-reported: lung cancer || id:ukb-a-54	rs4129267	0.00155168	0.00190922	0.416371
Ankylosing spondylitis || id:ebi-a-GCST005529	Cancer code self-reported: lung cancer || id:ukb-a-54	rs41299637	0.00166874	0.00162352	0.30402
Ankylosing spondylitis || id:ebi-a-GCST005529	Cancer code self-reported: lung cancer || id:ukb-a-54	rs4672505	0.00144444	0.00100779	0.15178
Ankylosing spondylitis || id:ebi-a-GCST005529	Cancer code self-reported: lung cancer || id:ukb-a-54	rs4676410	-0.00234481	0.00254262	0.356422
Ankylosing spondylitis || id:ebi-a-GCST005529	Cancer code self-reported: lung cancer || id:ukb-a-54	rs6556416	-0.00119733	0.00245309	0.625484
Ankylosing spondylitis || id:ebi-a-GCST005529	Cancer code self-reported: lung cancer || id:ukb-a-54	rs6600247	0.00174589	0.00176767	0.323312
Ankylosing spondylitis || id:ebi-a-GCST005529	Cancer code self-reported: lung cancer || id:ukb-a-54	rs7191548	-0.000283565	0.00241611	0.906571
Ankylosing spondylitis || id:ebi-a-GCST005529	Cancer code self-reported: lung cancer || id:ukb-a-54	rs743479	0.00407776	0.00252927	0.106912
Ankylosing spondylitis || id:ebi-a-GCST005529	Cancer code self-reported: lung cancer || id:ukb-a-54	rs9901869	-0.000367595	0.00181676	0.839655

## Sheet: Supplementary Table 7
Supplementary Table 7. Effect estimates from MR-Egger regression for ankylosing spondylitis.
Outcome	MR-Egger regression
	Intercept	Standard error	P-value
Lung Cancer	-0.0072	0.0069	0.3146
Lung Adenocarcinoma	-0.0083	0.0116	0.4829
Squamous Cell Lung Carcinoma	-0.0042	0.0123	0.7377
Lung cancer || id:ieu-b-4954	7.1817e-05	9.89069e-05	0.475098
Cancer code self-reported: lung cancer || id:ukb-a-54	-2.18538e-05	2.32034e-05	0.232034

## Sheet: Supplementary Table 8
Supplementary Table 8. Mendelian Randomization analyses effect estimates for associations between smoking behaviors and risk of AS.
outcome	exposure	method	nsnp	OR	95% CI	pval
Ankylosing spondylitis || id:ebi-a-GCST005529	Ever smoked || id:ukb-b-20261	MR Egger	4	20.3436	0.7594-544.9825	0.214345
	Ever smoked || id:ukb-b-20261	Weighted median	4	1.94128	0.9510-3.9629	0.0684704
	Ever smoked || id:ukb-b-20261	Inverse variance weighted	4	1.77626	0.6432-4.9049	0.267604
	Ever smoked || id:ukb-b-20261	Simple mode	4	2.04247	0.7884-5.2916	0.237817
	Ever smoked || id:ukb-b-20261	Weighted mode	4	2.19074	0.9655-4.9706	0.157296
Ankylosing spondylitis || id:ebi-a-GCST005529	Current tobacco smoking || id:ukb-b-223	MR Egger	6	806.535	0.4194-1551170.9405	0.157804
	Current tobacco smoking || id:ukb-b-223	Weighted median	6	0.947553	0.4979-1.8033	0.869666
	Current tobacco smoking || id:ukb-b-223	Inverse variance weighted	6	0.753787	0.4258-1.3344	0.332074
	Current tobacco smoking || id:ukb-b-223	Simple mode	6	1.1197	0.4673-2.6831	0.809926
	Current tobacco smoking || id:ukb-b-223	Weighted mode	6	1.13596	0.5004-2.5786	0.772802
OR: odds ratio, CI: confidence interval

## Sheet: Supplementary Table 9
Supplementary Table 9. Mendelian Randomization analyses for causal effects from AS to common risks factor of lung cancer.
Outcomes	Causal effect (95% CI)	P value
Alcohol consumption	1.0032 (0.9749, 1.0322)	0.8285
COPD	1.0006 (0.9993, 1.0018)	0.3582
Meat consumers	1.0073 (0.9856, 1.0295)	0.511
Processed meat intake	1.006 (0.9840, 1.0286)	0.5956
COPD: chronic obstructive pulmonary disease; CI: confidence interval.

## Sheet: Supplementary Table 10
Supplementary Table 10. Heterogeneity analysis using Cochran's Q test.
outcome	exposure	method	Cochran's Q test	Degree of Freedom	p-value
Lung adenocarcinoma || id:ieu-a-965	Ankylosing spondylitis || id:ebi-a-GCST005529	MR Egger	24.911	21	0.25104
Lung adenocarcinoma || id:ieu-a-965	Ankylosing spondylitis || id:ebi-a-GCST005529	Inverse variance weighted	25.5163	22	0.273029
Lung cancer || id:ieu-a-966	Ankylosing spondylitis || id:ebi-a-GCST005529	MR Egger	15.4648	21	0.798928
Lung cancer || id:ieu-a-966	Ankylosing spondylitis || id:ebi-a-GCST005529	Inverse variance weighted	16.5264	22	0.78893
Squamous cell lung cancer || id:ieu-a-967	Ankylosing spondylitis || id:ebi-a-GCST005529	MR Egger	28.2074	21	0.134368
Squamous cell lung cancer || id:ieu-a-967	Ankylosing spondylitis || id:ebi-a-GCST005529	Inverse variance weighted	28.3621	22	0.16399
Lung cancer || id:ieu-b-4954	Ankylosing spondylitis || id:ebi-a-GCST005530	MR Egger	41.8523	23	0.0944496
Lung cancer || id:ieu-b-4954	Ankylosing spondylitis || id:ebi-a-GCST005531	Inverse variance weighted	42.8117	24	0.104509
Cancer code self-reported: lung cancer || id:ukb-a-54	Ankylosing spondylitis || id:ebi-a-GCST005532	MR Egger	25.966	23	0.302476
Cancer code self-reported: lung cancer || id:ukb-a-54	Ankylosing spondylitis || id:ebi-a-GCST005533	Inverse variance weighted	26.9674	24	0.305975
OR*: odds ratio, CI*: confidence interval.
